1 Swarmer cell development of the bacterium *Proteus mirabilis* requires the conserved ECA  
2 biosynthesis gene, *rffG*

3

4 Kristin Little, Murray J. Tipping, and Karine A. Gibbs<sup>#</sup>

5 Department of Molecular and Cellular Biology, Harvard University, 16 Divinity Avenue

6 Cambridge MA, 02138, USA

7

8 **Running head:** Swarmer cell development requires the *rffG* gene

9

10 <sup>#</sup> Address correspondence to:

11 K. A. Gibbs, Ph.D.

12 Department of Molecular and Cellular Biology

13 Harvard University

14 16 Divinity Avenue

15 Cambridge, MA 02138

16 Ph: +1 617-496-1637

17 Em: [kagibbs@mcb.harvard.edu](mailto:kagibbs@mcb.harvard.edu)

18

19

20

21 **Abstract**

22 Individual cells of the bacterium *Proteus mirabilis* can elongate up to 40-fold on surfaces  
23 before engaging in a cooperative surface-based motility termed swarming. How cells regulate  
24 this dramatic morphological remodeling remains an open question. In this paper, we move  
25 forward the understanding of this regulation by demonstrating that *P. mirabilis* requires the gene  
26 *rffG* for swarmer cell elongation and subsequent swarm motility. The *rffG* gene encodes a  
27 protein homologous to the dTDP-glucose 4,6 dehydratase protein of *Escherichia coli*, which  
28 contributes to Enterobacterial Common Antigen biosynthesis. Here we characterize the *rffG* gene  
29 in *P. mirabilis*, demonstrating that it is required for the production of large lipopolysaccharide-  
30 linked moieties necessary for wild-type cell envelope integrity. We show that absence of the *rffG*  
31 gene induces several stress-responsive pathways including those controlled by the transcriptional  
32 regulators RpoS, CaiF, and RcsB. We further show that in *rffG*-deficient cells, suppression of the  
33 Rcs phosphorelay, via loss of RcsB, is sufficient to induce cell elongation and swarm motility.  
34 However, loss of RcsB does not rescue cell envelope integrity defects and instead results in  
35 abnormally shaped cells, including cells producing more than two poles. We conclude that a  
36 RcsB-mediated response acts to suppress emergence of shape defects in cell envelope-  
37 compromised cells, suggesting an additional role for RcsB in maintaining cell morphology under  
38 stress conditions. We further propose that the composition of the cell envelope acts as a  
39 checkpoint before cells initiate swarmer cell elongation and motility.

40

41

42

43

44 **Importance statement**

45 *P. mirabilis* swarm motility has been implicated in pathogenesis. We have found that  
46 cells deploy multiple uncharacterized strategies to handle cell envelope stress beyond the Rcs  
47 phosphorelay when attempting to engage in swarm motility. While RcsB is known to directly  
48 inhibit the master transcriptional regulator for swarming, we have shown an additional role for  
49 RcsB in protecting cell morphology. These data support a growing appreciation that the Rcs  
50 phosphorelay is a multi-functional regulator of cell morphology in addition to its role in  
51 microbial stress responses. These data also strengthen the paradigm that outer membrane  
52 composition is a crucial checkpoint for modulating entry into swarm motility. Furthermore, the  
53 *rffG*-dependent moieties provide a novel, attractive target for potential antimicrobials.

54

55

56

57 **Introduction**

58 Bacteria can migrate across a surface using a cooperative group motility termed  
59 swarming. For *Proteus mirabilis*, a gram-negative opportunistic pathogen, rapid surface-based  
60 swarm motility likely contributes to its pathogenesis during catheter associated urinary tract  
61 infections (1, 2). On hard agar (1.5 - 2%) surfaces, cells elongate from ~ 2  $\mu\text{m}$  rods into hyper-  
62 flagellated, snake-like "swarmer" cells that carry multiple chromosomes and range in length from  
63 10 – 80  $\mu\text{m}$  (3-5). Cell elongation and enhanced flagellar gene expression are considered  
64 genetically linked and occur upon growth on a hard agar surface (6-9). Multiple swarmer cells  
65 closely associate into rafts that collectively move across a surface (3, 5, 10). After a defined  
66 period of motility, swarmer cells divide into short (1 – 2  $\mu\text{m}$ ) non-motile rod-shaped cells (11).  
67 Iterative rounds of swarmer cell elongation, group motility, and cell division comprise the  
68 swarmer cell developmental cycle and result in the rapid occupation of centimeter-scale surfaces  
69 in a stereotypical concentric ring pattern (11).

70 Swarmer cell elongation entails a broad range of physiological changes in addition to the  
71 dramatic morphological remodeling. Dozens of genes experience drastic changes in expression;  
72 for example, genes for flagella production become up-regulated on surfaces (12-16). Elongation  
73 into swarmer cells is also coordinated with changes to the cell envelope that minimally include  
74 alterations of the outer membrane. For example, in the outer membrane, lipopolysaccharide  
75 (LPS) structure is modified, fluidity is increased, and areas of phospholipid bilayer arise (17-19).  
76 Cells also transition through unknown mechanisms from being rigid to flexible (3-5).

77 In many bacteria, a bidirectional relationship exists between swarmer cell motility and  
78 cell envelope structure. There are several cell envelope biosynthesis pathways in  
79 Enterobacteriaceae such as LPS and Enterobacterial Common Antigen (ECA) biosynthesis for

80 the outer membrane and peptidoglycan biosynthesis for the cell wall. Interrogating the specific  
81 contribution of each pathway to *P. mirabilis* swarmer cell development has proven challenging,  
82 partly because these three pathways share a pool of substrates (20, 21). For example, in  
83 *Escherichia coli*, genetic modifications to each of these biosynthetic pathways can dramatically  
84 alter cell shape and motility due to perturbations in the balance of the shared cell envelope  
85 substrate, undecaprenyl phosphate (20, 21). Moreover, disruption of cell envelope-associated  
86 genes inhibits swarmer cell development and motility of *P. mirabilis* through several  
87 mechanisms. For example, loss of the LPS biosynthesis gene *waaL* (22, 23) inhibits swarmer cell  
88 elongation and motility through activation of the Rcs phosphorelay (23), while the stress-  
89 associated sigma factor RpoE (24, 25) responds to disruptions of the LPS biosynthesis gene *ugd*  
90 (25). Less is known about role of ECA biosynthesis in *P. mirabilis*.

91 Cell envelope structure and stress sensing also appear to play broadly conserved roles in  
92 the swarm regulation of many bacterial species, including *P. mirabilis*, *E. coli*, and *Serratia*  
93 *marcescens* (20-22, 24, 26-30). In the aforementioned organisms, the Rcs (regulator of capsule  
94 synthesis) phosphorelay, which is a complex cell envelope stress-sensing signal transduction  
95 pathway, plays a key role in swarm motility inhibition (22, 26, 31). The Rcs phosphorelay,  
96 through the transcriptional regulator RcsB, directly represses the *flhDC* genes, which themselves  
97 encode the master transcriptional regulator of swarming, FlhD<sub>4</sub>C<sub>2</sub> (27, 29). The current paradigm  
98 is that cell envelope stress or outer membrane defects activate membrane-localized Rcs proteins,  
99 which then phosphorylate and activate the response regulator RcsB (22, 26, 27, 31) (see also  
100 reviews (32, 33)). Decreased levels of *flhDC* result in reduced flagella production and the failure  
101 of cells to elongate, thus inhibiting swarm motility. RcsB directly activates the expression of the  
102 cell division-related genes, *minCDE*; however, the molecular mechanisms of this regulation

103 remain unclear (6, 7). RcsB also induces production of several fimbrial genes, including  
104 paralogues of the fimbrial transcriptional regulator MrpJ. Together, RcsB and MrpJ modulate  
105 broad transcriptional and behavioral changes to promote cell adherence and biofilm formation  
106 and to repress swarm motility (7, 34).

107         Here we address the role of the cell envelope and stress sensing pathways in the  
108 regulation of swarmer cell development, an early stage of swarm motility. We show that *P.*  
109 *mirabilis* cells require the *rffG* gene, which is predicted to encode the sugar-modifying enzyme  
110 dTDP glucose-4,6-dehydratase, to produce an uncharacterized LPS-linked structural component  
111 of the cell envelope. As a homologous *rffG* gene and its conserved cluster of flanking genes are  
112 responsible for ECA production in *E. coli* (35), we posit that these structures may be ECA-  
113 derived. We further show that cells lacking the *rffG* gene remain short on swarm-permissive  
114 surfaces and suffer from cell envelope integrity defects that make elongated cells more  
115 susceptible to rupturing. We found that *rffG*-dependent moieties were not physically required for  
116 swarmer cell elongation; instead, loss of the *rffG* gene activated several swarm-inhibitory  
117 pathways, including the Rcs phosphorelay. Indeed, a RcsB-mediated response was sufficient to  
118 restrict swarmer cell elongation of *rffG*-deficient cells by inhibiting *flhDC* expression. We have  
119 also identified a novel role for RcsB in the maintenance of cell morphology during swarmer cell  
120 elongation. We found that RcsB was necessary to suppress the cell morphology of *rffG*-deficient  
121 cells that were genetically forced to elongate into swarmer cells. We posit that cell envelope  
122 composition is a crucial signaling checkpoint before entry into surface-based swarm motility.  
123 The Rcs phosphorelay response regulator not only mediates this signaling checkpoint, but also  
124 serves an important role in maintaining a normal cell shape during swarmer cell elongation.

125

126 **Results**

127 **Cells require the *rffG* gene to complete swarmer cell elongation and initiate swarming.**

128 Previous research has explored the role of LPS biosynthesis genes in the regulation of *P.*  
129 *mirabilis* swarm motility, but a role for ECA has not been described (23, 25). Here, we  
130 interrogated the role in swarming of a gene associated with ECA biosynthesis. We characterized  
131 a swarm-deficient mutant strain presumably incapable of producing ECA by generating a  
132 chromosomal deletion of the *rffG* gene in *P. mirabilis* strain BB2000, resulting in a  $\Delta rffG$  strain.  
133 A colony of the wild-type strain occupied a circle of 10-centimeter diameter by 24 hours on  
134 swarm-permissive and nutrient-rich CM55 agar; however, colonies of the  $\Delta rffG$  population did  
135 not expand beyond the site of inoculation (Figure 1A). We complemented the *rffG* deletion  
136 through *in trans* expression of the *rffG* gene under control of a *lac* promoter for constitutive  
137 expression in *P. mirabilis* (23), resulting in the  $\Delta rffG$  *prffG* strain. The wild-type and the  $\Delta rffG$   
138 strain each carried empty vectors (pBBR1-NheI) to enable growth on the same selective medium  
139 as the  $\Delta rffG$  *prffG* strain. The swarm colonies of the  $\Delta rffG$  *prffG* strain were attenuated by  
140 comparison to the wild-type strain and more expansive than those of the  $\Delta rffG$  strain (Figure  
141 1A), indicating a partial rescue of swarm motility.

142 We next examined the swim motility of these strains to determine whether loss of *rffG*  
143 broadly inhibits flagella-based motility. We analyzed the motility of the wild-type,  $\Delta rffG$ , and  
144  $\Delta rffG$  *prffG* strains through 0.3% LB agar, which permits swimming. The  $\Delta rffG$  strain, and to a  
145 lesser extent the  $\Delta rffG$  *prffG* strain, was delayed in the initiation of swimming as compared to the  
146 wild-type strain. However, all strains occupied the full 10-cm diameter petri dish within 24 hours  
147 (Figure SF1A). We measured cell viability in both liquid (Figure SF1B) and in swarms (Figure  
148 SF1C) and found that all populations grew to equivalent densities. Thus, the *rffG* gene was

149 essential for surface-based swarm motility, but not for liquid-based swimming motility or  
150 growth.

151         Given that cells required the *rffG* gene to engage in surface-based motility, we  
152 hypothesized that cells of the  $\Delta rffG$  strain might fail to progress through stages of swarming such  
153 as increased expression of *flhDC*-regulated genes, elongation into swarmer cells, or migration  
154 across a surface (Figure 1B). Therefore, we independently assessed the cell morphology of the  
155 wild-type,  $\Delta rffG$ , and  $\Delta rffG$  *prffG* strains using epifluorescence microscopy under swarm-  
156 permissive conditions. To visualize flagellar gene expression, a Venus fluorescent protein  
157 reporter was introduced on the chromosomes of each strain background downstream of *fliA*. The  
158 *fliA* gene encodes the flagellar sigma factor ( $\sigma^{28}$ ) and is both directly regulated by FlhD<sub>4</sub>C<sub>2</sub> and  
159 highly expressed in swarming cells (36, 37). By four hours after inoculation onto CM55 agar at  
160 37°C, populations of the wild-type strain contained many short non-motile and few elongated  
161 motile cells (Figure 1B). After six hours, elongated cells expressing the fluorescent *fliA* reporter  
162 dominated the inoculum edge and were apparent at the leading edge of the swarms (Figure 1B).  
163 By contrast, most cells of the  $\Delta rffG$  strain were short and non-motile at four and six hours; cells  
164 appeared modestly shorter than non-elongated wild-type cells (Figure 1B). Cells of the  $\Delta rffG$   
165 strain largely did not exhibit *fliA*-associated fluorescence (Figure 1B). We confirmed the  
166 reduction of flagella by visualizing cells harvested from a swarm using transmission electron  
167 microscopy. Cells of the  $\Delta rffG$  strain were uniformly short and lacked the extended structures  
168 present on the wild-type elongated swarmer cells (Figure SF1D). Notably, some cells of the  
169  $\Delta rffG$  strain did initiate elongation but often ruptured or divided into short cells before  
170 completing elongation (Figure SF1E), indicating a failure to complete swarmer cell elongation.  
171 By contrast, cells of the  $\Delta rffG$  *prffG* strain formed elongated motile cells displaying *fliA*-



172 associated fluorescence by six hours (Figure 1B); this progression was delayed as compared to  
173 the wild-type strain, which is consistent with a partial rescue. Therefore, as cells of the  $\Delta rffG$   
174 strain failed to increase expression of flagellar genes and to elongate into swarmer cells upon  
175 surface contact, we concluded that the *rffG* gene was necessary and sufficient for cells to initiate  
176 swarmer cell elongation.

177

178 **The *rffG* gene is essential for the production of LPS-associated moieties necessary for cell**  
179 **envelope integrity.**

180 We considered that the lack of swarmer cell elongation in the  $\Delta rffG$  strain could be  
181 caused by either a physical constraint such as a lack of membrane integrity or by activation of  
182 swarm-inhibitory signaling pathways. Therefore, we first examined the membrane composition  
183 and integrity of this strain. In *P. mirabilis*, ECA can exist in many forms: linked to other lipids,  
184 found in a circularized and soluble form, or surface-exposed and linked to the LPS core in the  
185 outer membrane (35, 38-42). Repeated efforts to confirm the presence of ECA via Western  
186 blotting with *E. coli* O14 serum (SSI Diagnostica, Hillerød, Denmark), which is reactive against  
187 *E. coli*-derived ECA (43, 44), were unsuccessful. We instead characterized overall LPS  
188 composition and cell envelope sensitivity to antibiotics. We extracted LPS from surface-grown  
189 colonies of the wild-type,  $\Delta rffG$ , and  $\Delta rffG$  *prffG* strains and then visualized the LPS-associated  
190 moieties using silver stain (45). The observed banding patterns of the wild-type and  $\Delta rffG$  *prffG*  
191 strains were nearly equivalent (Figure 2A). The banding pattern of the  $\Delta rffG$  strain, however,  
192 lacked a high molecular weight smear, and the bands within the putative O-antigen ladder  
193 formed double bands instead of a single band (Figure 2A). We concluded that the *rffG* gene was  
194 essential for production of full-length and wild-type LPS, specifically the O-antigen and the high

195 molecular weight components.

196 We reasoned that these perturbations to the LPS components might cause broader cell  
197 envelope damage in cells of the  $\Delta rffG$  strain. To target the outer membrane, we measured  
198 resistance to polymyxin B, bile salts, and sodium dodecyl-sulfate (SDS). Polymyxin B is thought  
199 to bind LPS, and disruption of LPS biosynthesis genes causes polymyxin B sensitivity in *P.*  
200 *mirabilis* (25, 46). Bile salts (47) and SDS broadly target membranes through detergent-like  
201 effects. ECA is likely involved in bile salts resistance of *Salmonella enterica* (48); however, a  
202 role for ECA in bile salt resistance of *P. mirabilis* has not been explored. Populations of the  
203 wild-type and the  $\Delta rffG$  strains were resistant to fully saturated solutions (50 mg/mL) of  
204 polymyxin B (Table 1; Figure SF2A) and exhibited reduced growth on 0.5% bile salts (Table 1;  
205 Figure SF2B). However, the growth defects of the  $\Delta rffG$  strain on 0.2% bile salts were more  
206 severe than those of the wild-type strain. The  $\Delta rffG$  strain was reduced in growth and formed  
207 small and translucent colonies (Figure SF2B). The  $\Delta rffG$  strain was also more sensitive to SDS  
208 than the wild-type strain. 0.5% SDS was permissive for growth of the wild-type strain but not for  
209 the  $\Delta rffG$  strain (Table 1; Figure SF2C). As controls, we measured sensitivity to the non-  
210 membrane targeting antibiotics, gentamycin and kanamycin. We found no differences in growth  
211 between the wild-type and the  $\Delta rffG$  strains when grown on gentamycin and kanamycin (Table  
212 1). In sum, the *rffG*-deficient cells exhibited increased sensitivity to bile salts and SDS, but not to  
213 polymyxin B, gentamycin, and kanamycin. Therefore, the outer membrane in *rffG*-deficient cells  
214 was compromised in a phenotypically distinct manner than previously studied LPS-deficient *P.*  
215 *mirabilis* strains.

216 To further interrogate cell envelope integrity, we analyzed cell morphology in response to  
217 a subinhibitory concentration (10  $\mu$ g/ml) of the beta-lactam antibiotic carbenicillin. Within one

218 hour of growth on carbenicillin-containing CM55 agar at 37°C, we observed that wild-type cells  
219 lengthened to tens of microns while remaining a uniform diameter (Figure 2B). By four hours of  
220 growth, occasional bloating was apparent at the mid-cell (Figure 2B). By contrast after one hour  
221 of growth on carbenicillin-containing CM55 agar at 37°C, many cells of the  $\Delta rffG$  strains  
222 remained short; the few elongated cells appeared wider or lemon-shaped (Figure 2B). After two  
223 hours of growth, the population of the  $\Delta rffG$  strain consisted of elongated, bloated cells,  
224 including several with triangular protrusions (Figure 2B). By four hours of growth, most cells of  
225 the  $\Delta rffG$  strain had ruptured; the remaining cells were several microns long (Figure 2B).  
226 Equivalent results were attained with Aztreonam, an inhibitor of the cell division protein, FtsI  
227 (Figure SF2D). The *rffG*-deficient cells were therefore more susceptible to cell wall stress and  
228 membrane-targeting detergents, indicating that the composition of the outer membrane in *rffG*-  
229 deficient cells was compromised.

230

### 231 **The *rffG* deficiency induces stress responsive pathways in cells.**

232 Loss of the *rffG* gene resulted in altered cell envelope structure (Figure 2A) and stability  
233 (Figures 2B, SF2D), both of which would likely induce stress-responsive pathways.

234 Interestingly, the *rffG*-deficient cells could transiently elongate when artificially driven to expand  
235 in length using carbenicillin; therefore, inhibited elongation in these cells was not purely due to  
236 disrupted physical structures of the cell envelope. Such cell envelope stress in *P. mirabilis* can  
237 activate several swarm-inhibitory pathways such as those controlled by RcsB, RpoE, and  
238 RppA/B (22, 24, 25, 30). To identify whether one or more of these pathways was induced in  
239 *rffG*-deficient cells, we performed RNA-Seq analysis on cells of the wild-type and  $\Delta rffG$  strains  
240 harvested under swarm-permissive conditions. Two biological replicates were acquired and

241 examined. Short, non-motile cells harvested from swarms of the wild-type strain were used as  
242 the control for these experiments.

243 343 genes out of ~3455 protein-coding genes in the *P. mirabilis* BB2000 genome were  
244 expressed at least four-fold differently (Figure SF3). 136 genes were decreased in the  $\Delta rffG$   
245 strain, of which approximately 18% of were related to ribosome structure and translation, and  
246 20% were directly related to flagella assembly or chemotaxis (Table S1). Additional factors  
247 known to regulate swarmer cell development and motility also had decreased expression,  
248 including *umoD* at 0.12-fold, *umoA* at 0.19-fold, and *ccm* at 0.12-fold (Table 2). Cell-envelope  
249 associated genes were also down-regulated, e.g., the penicillin-binding protein gene *pbpC* and  
250 the membrane lipid modifying gene *ddg* at 0.25 and 0.22-fold, respectively (Table S1). By  
251 contrast, 207 genes were increased, including the virulence-associated MR/P fimbria (200-fold  
252 increased expression of *mrpA*) and *Proteus* P-like pili (55.5-fold increased expression of *pmpA*)  
253 (Tables 3 and S2). In addition, several genes related to carnitine metabolism were increased,  
254 including the transcriptional regulator *caiF* at 63.6-fold and *caiA*, *fixC*, and *fixX* at four-fold  
255 (Tables 3 and S2). Carnitine can be metabolized, particularly under anaerobic conditions (49-51),  
256 and can act as a stress protectant for several bacterial species (52, 53) (also reviewed in (54)).  
257 Likewise, *ompW* was increased ~ 33.7 fold along with *dcuB*, an anaerobic C4-dicarboxylate  
258 transporter, at 29.6 fold (Tables 3 and S2). In *E. coli*, maximal *ompW* expression is tied to  
259 survival in the transition from aerobic to anaerobic growth (55). Therefore, genes for fimbrial  
260 production and for metabolism under anaerobic or micro-aerobic environments were more highly  
261 expressed in the *rffG*-deficient cells; by contrast, genes promoting swarm motility were  
262 decreased.

263 Notably, three major regulators were expressed much higher in the  $\Delta rffG$  strain (Table 2):  
264 *mrpJ* at 19.1-fold, *rpoS* at 8.7-fold, and the RcsB-cofactor *rcaA* at 9.9-fold. Both *mrpJ* and *rcaA*  
265 were previously shown to contribute to swarm inhibition (6, 7, 34). We observed a partial  
266 overlap between differentially regulated genes and the characterized MrpJ regulon (34).  
267 However, we found a larger overlap between the genes differentially regulated in the  $\Delta rffG$   
268 populations with the genes recently characterized as regulated by RcsB in *P. mirabilis* (Tables 2  
269 and 3) (6, 7). The overlap was especially striking among down-regulated genes. While about 8%  
270 of up-regulated genes overlapped with the Rcs regulon, 24% of down-regulated genes  
271 overlapped with the Rcs regulon (Figure SF3). RcsB directly represses *flhDC*, which in turn  
272 regulates flagella and chemotaxis genes, positively regulates paralogues of the swarm-inhibitory  
273 *mrpJ* gene (6, 7), and regulates *minCDE* (6). Therefore, we hypothesized that the Rcs  
274 phosphorelay was likely activated in the *rffG*-deficient cells.

275

### 276 **RcsB inhibits swarmer cell elongation and morphology defects of *rffG*-deficient cells.**

277 We hypothesized that RcsB-mediated repression of the swarm transcriptional regulator  
278 *flhDC* was the primary cause for loss of swarmer cell elongation and swarm motility of the  $\Delta rffG$   
279 strain. Therefore, we independently constructed a chromosomal deletion of *rcaB* in the wild-type  
280 and the  $\Delta rffG$  strains, resulting in the  $\Delta rcaB$  and  $\Delta rffG\Delta rcaB$  strains, respectively. We also  
281 constructed a plasmid for constitutive and increased expression of *flhDC* and introduced this *in*  
282 *trans* in the wild-type and the  $\Delta rffG$  strains, resulting in BB2000 *pflhDC* and the  $\Delta rffG$  *pflhDC*  
283 strain, respectively. As RcsB is an upstream repressor of *flhDC*, we predicted that swarm  
284 motility and swarmer cell elongation would be rescued in both the  $\Delta rffG\Delta rcaB$  and the  $\Delta rffG$   
285 *pflhDC* strains. The  $\Delta rcaB$  and BB2000 *pflhDC* strains were predicted to contain constitutively

286 swarming cells based on equivalent constructs in other *P. mirabilis* wild-type backgrounds (9,  
287 29). We inoculated all strains onto separate swarm-permissive agar plates and analyzed colony  
288 expansion over 24 hours growth at 37°C (Figure 3). As predicted, the  $\Delta rcsB$  and BB2000 *pflhDC*  
289 strains expanded across the 10-cm diameter plate by 16 hours (Figure 3A). However, neither the  
290  $\Delta rffG\Delta rcsB$  nor  $\Delta rffG pflhDC$  strains expanded beyond 20% of the plate by 16 hours (Figure  
291 3A). The  $\Delta rffG pflhDC$  strain did reach the edge of plate by 24 hours, but the  $\Delta rffG\Delta rcsB$  strain  
292 remained constrained towards the center (Figure 3B). Extracted LPS of these strains grown in  
293 liquid broth and on surfaces were analyzed. We found that the banding pattern of the  $\Delta rcsB$   
294 strain was equivalent to that of the wild-type strain, BB2000 (Figure SF4). Likewise, the banding  
295 pattern of the  $\Delta rffG\Delta rcsB$  and the  $\Delta rffG pflhDC$  strains were equivalent to that of the  $\Delta rffG$  strain  
296 (Figure SF4). Thus, neither RcsB nor FlhD<sub>4</sub>C<sub>2</sub> contributed to the production of the *rffG*-  
297 dependent LPS-associated moieties. However, increased expression of *pflhDC* or deletion of *rcsB*  
298 was sufficient to increase swarm motility of *rffG*-deficient cells, indicating that RcsB-mediated  
299 repression of *pflhDC* was sufficient for the swarm inhibition of *rffG*-deficient cells.

300         Since the  $\Delta rffG\Delta rcsB$  strain did not have full recovery of swarm motility by 24 hours, we  
301 hypothesized that the loss of the *rcsB* gene might affect a pathway separate from the FlhD<sub>4</sub>C<sub>2</sub>-  
302 regulated genes. We integrated the chromosomal *fliA*-Venus transcriptional reporter into each  
303 strain and observed the resultant cells using epifluorescence microscopy under swarm-permissive  
304 conditions. After six hours of growth at 37°C, the BB2000 *pflhDC* -derived and the  $\Delta rffG$   
305 *pflhDC*-derived strains consisted of motile, elongated cells with *fliA* reporter-associated  
306 fluorescence (Figure 4). Likewise, cells in the  $\Delta rcsB$  strain were generally elongated and motile  
307 with *fliA* reporter-associated fluorescence (Figure 4). Surprisingly, cells of the  $\Delta rffG\Delta rcsB$  strain  
308 exhibited severe cell shape defects: cells were bloated and uneven in width, forming spheres,

309 tapering at the cell poles, or bulging at the mid-cell (Figure 4). In addition, several cells of the  
310  $\Delta rffG\Delta rcsB$  strain were forked at the cell pole or branched at the mid-cell, resulting in the  
311 formation of more than two cell poles. Nonetheless, the elongated cells of the  $\Delta rffG\Delta rcsB$  strain  
312 exhibited *fliA* reporter-associated fluorescence and were motile (Figure 4). In sum, cells of the  
313  $\Delta rffG\Delta rcsB$  strain did not retain fidelity of a two-pole, rod-shaped swarmer cell morphology,  
314 even though they had increased *fliA* expression. Thus, RcsB contributed to the suppression of  
315 shape defects in *rffG*-deficient cells. As these defects only arose in the absence of RcsB, we posit  
316 this was achieved via RcsB-dependent and FlhD<sub>4</sub>C<sub>2</sub>-independent pathway(s).

317

## 318 **Discussion**

319 Here crucial insights were elucidated about the role of cell envelope structure and stress  
320 sensing in the development of *P. mirabilis* swarmer cells, specifically regarding the cell envelope  
321 biosynthesis gene *rffG* and the signaling pathways that respond to its absence (Figure 5). We  
322 have shown that the *rffG* gene was essential for the assembly of a swarm-permissive cell  
323 envelope. Loss of the *rffG* gene resulted in the loss of LPS-associated moieties, the alteration of  
324 the O-antigen ladder, and increased sensitivity to antimicrobials that specifically target the cell  
325 envelope. Based on the RNA-Seq results, cells of the  $\Delta rffG$  strain entered into a distinctive  
326 transcriptional state, resulting in the upregulation of several stress responsive pathways. While  
327 most of the pathways activated by loss of *rffG* have yet to be characterized, RcsB-mediated  
328 inhibition of *flhDC* expression was a major regulatory factor in restricting elongation in the  
329  $\Delta rffG$  strain. Loss of *rscB* or over-expression of *flhDC* rescued swarm motility in  $\Delta rffG$  cells.  
330 Moreover, an additional role for RcsB in the maintenance of cell shape and polarity during

331 swarmer cell elongation was uncovered as RcsB served to also maintain the two-pole, rod shape  
332 of *rffG*-deficient cells.

333         The transcriptional state of cells in the  $\Delta rffG$  strain was characterized by the activation of  
334 pathways such as those controlled by the transcriptional regulators RpoS, CaiF, and RcsB. There  
335 was increased expression of several fimbrial gene clusters. There was also a notable increase in  
336 carnitine metabolism genes, which is associated with growth under anaerobic conditions (50,  
337 51). Many of the identified genes are controlled by MrpJ and oxygen availability (56), raising the  
338 possibility that cells of the  $\Delta rffG$  strain might bias towards a more adherent, low-oxygen  
339 lifestyle. Flagellar and chemotaxis genes had decreased expression in the  $\Delta rffG$  strain. The  
340 disruption of the flagellar pathway was consistent with the loss of swarm motility in the  $\Delta rffG$   
341 strain. However, potential mechanisms for inhibiting cell elongation and driving cell shape  
342 defects were less apparent in the RNA-Seq data. For example, while RcsB has been implicated in  
343 cell elongation via regulation of *minCDE* (6, 7), differential regulation of these genes in the  
344  $\Delta rffG$  strain was not evident. Further research will need to be done to completely categorize the  
345 genes differentially regulated in *rffG*-deficient cells and to fully understand the physiological and  
346 behavioral implications of these altered expression levels.

347         Several questions remain regarding the mechanisms of activation, as well as the  
348 downstream activity, of RcsB and MrpJ in  $\Delta rffG$  cells. First, Bode et al recently demonstrated  
349 that MrpJ acts as a regulator mediating the transition of cells between swarm motility (MrpJ-  
350 repressed) and non-motile adherence (MrpJ-induced) similar to RcsB (34). MrpJ and RcsB may  
351 positively regulate each other and have overlapping regulons (6, 7, 34), making it difficult to  
352 genetically disentangle the contributions of each regulator. Additionally, perturbation of outer  
353 membrane structures appears to be communicated to the Rcs phosphorelay through both RcsF-



354 dependent and independent pathways in *P. mirabilis* (22). Whether cell envelope stress of *rffG*-  
355 deficient cells is communicated through the outer membrane-localized RcsF, through the  
356 upregulation of RcsA, or through an uncharacterized additional pathway remains to be  
357 determined. Also unknown is whether the *rffG*-dependent LPS-associated moieties communicate  
358 to Rcs via the Umo system as was previously shown for O-antigen (22).

359         Previous research has elucidated how disrupting LPS induces stress-responsive pathways  
360 leads to swarm inhibition. For example, abrogation of O-antigen structure through deletion of the  
361 O-antigen ligase (*waaL*) or chain length determinant (*wzz*) inhibits activation of *flhDC* upon  
362 surface contact (23). And loss of the sugar-modifying O-antigen biosynthesis genes *ugd* and  
363 *galU* inhibits swarmer cell elongation and motility (25). The aforementioned genes are  
364 implicated in LPS biosynthesis. Here we propose that *P. mirabilis* cells require cell envelope  
365 structures in addition to LPS for the initiation of swarmer cell elongation (Figure 5). The *rffG*-  
366 dependent high molecular weight LPS-associated moieties are not chemically characterized; we  
367 hypothesize that these might consist of LPS-associated ECA or ECA-derived moieties since the  
368 *E. coli rffG* homologue is needed for the production of the broadly conserved ECA (35). Further  
369 research is needed to characterize the structural changes to the outer membrane in *rffG*-deficient  
370 cells, especially as these moieties contribute to overall membrane integrity on surfaces.

371         Outer membrane structure also plays a crucial mechanical role in resisting turgor pressure  
372 fluctuations associated with cell wall stress, specifically beta-lactam drugs (57). Cells of the  
373  $\Delta rffG$  strain were sensitive to detergent-like membrane-targeting antimicrobials, altogether  
374 suggesting that the *rffG*-dependent moieties are crucial for outer membrane composition and  
375 integrity. One explanation is that these *rffG*-associated cell envelope defects are caused by  
376 pleiotropic effects resulting from disrupting a cell envelope biosynthesis pathway that uses a

377 shared pool of precursor molecules. We raise this possibility because perturbation of ECA or  
378 LPS biosynthesis genes in *E. coli* cause the accumulation of dead-end intermediates that broadly  
379 impact cell envelope integrity (20, 21). However, we instead posit that the cell envelope defects  
380 in *rffG*-deficient cells might be sufficient to sensitize cells to form defective cell shapes.

381 We propose that RcsB acts to suppress cell wall defects in *rffG*-deficient cells as well as  
382 potentially other cell-envelope compromised (Figure 5). We observed that absence of the *rffG*-  
383 dependent moieties did not mechanically restrict swarmer cell elongation or result in the  
384 formation of over two poles in artificially elongated cells constitutively expressing *flhDC*. Cells  
385 lacking both *rffG* and *rcsB* cells, however, exhibited growth from the mid-cell and the formation  
386 of over two cell poles in addition to other physical perturbations. Thus, though deletion of *rcsB*  
387 rescues cell elongation and motility through de-repression of *flhDC*, the absence of RcsB also  
388 perturbed a yet uncharacterized morphology-generating pathway critical for the cell shape and  
389 integrity of *rffG*-deficient cells. Others have also proposed that the Rcs phosphorelay plays a  
390 conditional role in cell shape maintenance in other bacteria. L-form *E. coli* cells require the Rcs  
391 phosphorelay to recover a rod shape; cells lacking this response rupture (58). The authors of that  
392 study proposed that Rcs might function to maintain cell shape in conditions in which cells lose  
393 cell wall through exposure to lysozyme or cationic antimicrobial peptides, including several  
394 niches within a human host (58). Moreover, in *E. coli* and *Agrobacterium tumefaciens*, cell  
395 polarity defects, which are similar to those of the  $\Delta rffG \Delta rcsB$  strain, appeared to arise from the  
396 formation of patches of inert peptidoglycan and mislocalized division planes (59-63). Further  
397 study is needed to mechanistically understand which aspects of the RcsB regulon are specific for  
398 cell shape maintenance and how additional poles emerge in cells lacking both RcsB and the *rffG*-  
399 dependent moieties.

400           It remains unclear how RcsB, which is presumably inactive in swarming cells, can play a  
401    role in swarmer cell shape maintenance. We propose two broad mechanisms that may resolve  
402    this contradiction. First, the role(s) of RcsB in cell shape maintenance may occur prior to  
403    initiation of swarmer cell elongation. Elongation may exacerbate unrepaired envelope flaws that  
404    manifest in cell shape and polarity defects. As such, the Rcs phosphorelay would act as a  
405    developmental checkpoint to restrict swarmer cell development in conditions challenging to the  
406    cell envelope. Second, RcsB may have multiple states beyond simply “active” and “inactive”  
407    that may allow differential activity across time and cell states. The DNA-binding activity of  
408    RcsB has been shown to be modulated by both phosphorylation and association with auxiliary  
409    transcription factors in *E. coli* (64). How RcsB activity is modulated downstream of  
410    phosphorylation and association with potential auxiliary transcription factors remains unknown  
411    in *P. mirabilis*.

412           Altogether, we propose that cell envelope stress, including the presence of *rffG*-  
413    dependent moieties, functions as a developmental checkpoint before swarmer cell elongation and  
414    increased flagellar gene expression (Figure 5). Under swarm-permissive conditions in the  
415    presence of wild-type cell envelope structure, the Rcs phosphorelay, along with other stress-  
416    sensing pathways, would be inactive thereby allowing the swarmer development to progress.  
417    When the cell envelope is perturbed, we posit that the activity of cell envelope stress-responsive  
418    sensors culminates in the adaptation of an adherence-promoting lifestyle that may provide  
419    protection against external stressors. As the Rcs phosphorelay, *flhDC*, and *rffG*, among other  
420    discussed genes, are conserved among the Enterobacteriaceae family, we predict these factors  
421    may broadly serve to modulate bacterial swarm motility and potentially cell development.

422

423 **Experimental Procedures**

424 Growth conditions

425 Liquid cultures were grown in LB-Lennox broth. Colonies were grown in 0.3 % LB agar for  
426 swimming motility assays, on LSW- agar (65) for plating non-motile colonies, and on CM55  
427 blood agar base (Oxoid, Hampshire, UK) for swarming. Antibiotics for selection were used  
428 throughout all assays as following: 15 µg/mL tetracycline (Amresco Biochemicals, Solon, OH),  
429 25 µg/mL streptomycin (Sigma Aldrich, St Louis, MO), and 35 µg/mL kanamycin (Corning,  
430 Corning, NY). For swarm assays, overnight cultures were normalized to OD<sub>600</sub> 1.0, and 1 µl of  
431 culture was inoculated with a needle onto swarm-permissive CM55 blood agar base (Oxoid,  
432 Hampshire, UK) plates containing 40 µg/mL Congo Red, 20 µg/mL Coomassie Blue, and  
433 kanamycin (Corning, Corning, NY) as needed. Plates were incubated at 37°C. When indicated,  
434 we used strains carrying an empty vector (pBBR1-NheI (66)) to confer kanamycin resistance.  
435 Images were taken with a Canon EOS 60D camera.

436

437 Strain construction

438 Strain construction was performed as described previously (67). Strains and plasmids are listed  
439 in Table 4. All plasmids were confirmed by Sanger Sequencing (Genewiz, South Plainfield, NJ).  
440 For all strains, expression plasmids were introduced into *P. mirabilis* via *E. coli* SM10λpir as  
441 previously described (65). Resultant strains were confirmed by Polymerase Chain Reaction  
442 (PCR) of the targeted region. The  $\Delta rffG$  strain was additionally confirmed through whole  
443 genome sequencing as described in (68).

444

445 For construction of the  $\Delta rcsB$  strain, a gBlock (Integrated DNA Technologies, Coralville, IA)  
446 containing the 452 base-pairs (bp) upstream and downstream of *rscB* (*P. mirabilis* BB2000,  
447 accession number CP004022:nt 1972701...1973153 and 1973809...1974261) was generated and  
448 introduced to pKNG101 at SpeI and XmaI sites using SLiCE (69). Similarly, for construction of  
449 the  $\Delta rffG$  strain, a gBlock containing a chloramphenicol resistance cassette (amplified from  
450 pBAD33 (70)) flanked by 1000 bp upstream of *rffG* and downstream of *rffG* (*P. mirabilis*  
451 BB2000, accession number CP004022:nt 3635400...3636399 and 3637473...3638473)  
452 (Integrated DNA Technologies, Coralville, IA) was introduced to pKNG101 (67) at the same  
453 sites. For construction of *fliA* reporter strains, a gBlock encoding the last 500 bp *fliA* (*P.*  
454 *mirabilis* BB2000, accession number CP004022:nt 1856328...1856828), RBS (aggagg), a  
455 modified variant of Venus fluorescent protein (a gift from Drs. Enrique Balleza and Philippe  
456 Cluzel (71), and 500bp downstream *fliA* (*P. mirabilis* BB2000, accession number CP004022:nt  
457 1855828...1856328) (Integrated DNA Technologies, Coralville, IA) was inserted into pKNG101  
458 (67) at the ApaI and XbaI sites. For construction of the *rffG* expression strains, the nucleotide  
459 sequence for *rffG* was amplified via PCR from the *P. mirabilis* chromosome using oKL273 and  
460 oKL274 and inserted into expression vector pBBR1-NheI (66) using AgeI and NheI restriction  
461 enzyme sites. For the *flhDC* expression strains, the nucleotide sequences *flhDC* (amplified using  
462 oKL277 and oKL278) was similarly inserted into pBBR1-NheI. A gBlock containing the *lac*  
463 promoter (Integrated DNA Technologies, Coralville, IA) was introduced upstream of the coding  
464 region using SLiCE (69).

465

466 LPS extraction and analysis

467 Cells were grown overnight at 37°C on swarm-permissive CM55 (Oxoid, Hampshire, UK)  
468 agar with antibiotics as needed and harvested with LB. LPS from cells was extracted using an  
469 LPS Extraction Kit according to manufacturer's instructions (iNtRON Biotechnology Inc,  
470 Sangdaewon Seongnam, Gyeonggi, Korea). Extracts were resuspended in 10mM Tris, pH 8.0  
471 buffer and run on a 12% SDS-PAGE gel. Gels were stained with a modified silver stain protocol  
472 (45).

473

#### 474 Halo assays (MIC determination)

475 Cultures were top-spread on LSW- medium and allowed to sit on benchtop until surface  
476 appeared dry (a couple of hours). 6 mm sterile filter disks were placed onto plates and soaked  
477 with 10  $\mu$ L of dilutions containing Polymyxin B (Sigma Aldrich, St Louis, MO), gentamycin  
478 (Calbiochem, San Diego, CA), or kanamycin (Corning, Corning, NY) in water. A water-alone  
479 control was included. Once filter disks dried (a couple of hours), plates were incubated at 37°C  
480 overnight and imaged.

481

#### 482 Bile salts and SDS resistance assays

483 Cultures were grown overnight, normalized to OD 1.0, and serial diluted 10-fold. 1  $\mu$ L spots of  
484  $10^{-1}$  to  $10^{-8}$  dilutions of each strain (in technical triplicate) were inoculated onto LSW- plates  
485 containing bile salts (Sigma Aldrich, St Louis, MO) or sodium dodecyl sulfate (SDS) (Sigma  
486 Aldrich, St Louis, MO) (filter sterile, added to medium post-autoclaving). Plates were incubated  
487 overnight at 37°C.

488

#### 489 Carbenicillin sensitivity assay

490 Cells were harvested from swarm permissive medium using LB broth and spread onto 1 mm  
491 CM55 (Oxoid, Hampshire, UK) agar pads containing 10  $\mu\text{g}/\text{mL}$  carbenicillin (Corning, Corning,  
492 NY). Cells were imaged after 1, 2, or 4 hours on surface. Three biological replicates were  
493 analyzed.

494

#### 495 Microscopy

496 Microscopy was performed as previously described (68). Briefly, CM55 (Oxoid, Hampshire,  
497 UK) agar pads, supplemented as needed with 35  $\mu\text{g}/\text{mL}$  kanamycin for plasmid retention, were  
498 inoculated from overnight stationary cultures and incubated at 37°C in a modified humidity  
499 chamber. Pads were imaged using a Leica DM5500B (Leica Microsystems, Buffalo Grove, IL)  
500 and a CoolSnap HQ2 cooled CCD camera (Photometrics, Tuscon, AZ). MetaMorph version  
501 7.8.0.0 (Molecular Devices, Sunnyvale, CA) was used for image acquisition. Images were  
502 analyzed using FIJI (72) (National Institutes of Health, USA); where indicated, images were  
503 subjected to background subtraction equally across entire image. Where indicated, cells were  
504 stained with 25  $\mu\text{M}$  TMA-DPH (Invitrogen, Carlsbad, CA), (max excitation 355 nm; max  
505 emission 430 nm) imaged in the DAPI channel using an A4 filter cube (excitation 360/40 nm;  
506 emission 470/40 nm) (Leica Microsystems, Buffalo Grove, IL). Venus (max excitation 515 nm;  
507 max emission 528 nm) was visualized in the GFP channel using a GFP ET filter cube (excitation  
508 470/40 nm; emission 525/50 nm) (Leica Microsystems, Buffalo Grove, IL). Fluorescence  
509 intensity and exposure times for each fluorescence channel were equivalent across all  
510 fluorescence microscopy experiments. Fluorescence due to Venus was not quantified and was  
511 visible due to the overlapping excitation and emission spectra with the GFP ET filter cube.

512

513 Transcriptional analysis

514 Strains were grown on CM55 (Oxoid, Hampshire, UK) plates at 37°C. For wild-type samples,  
515 colonies were inoculated on CM55 (Oxoid, Hampshire) agar and incubated overnight for swarm  
516 development. The presence of short, non-motile cells in consolidation phase was confirmed by  
517 light microscopy. Wild-type cells from the swarm edge were then harvested by scraping with a  
518 plastic loop into 1 ml of RNA Protect solution (Qiagen, Venlo, Netherlands). Samples of the  
519 *ΔrffG* strain were harvested after overnight incubation by scraping whole colonies into 1 ml  
520 RNA Protect solution. Total RNA was isolated using an RNeasy Mini kit (Qiagen, Venlo,  
521 Netherlands) according to the manufacturer's instructions. RNA purity was measured using an  
522 Agilent 2200 TapeStation (Agilent, Santa Clara, CA). To enrich mRNA, rRNA was digested  
523 using terminator 5' phosphate dependent exonuclease (Illumina, San Diego, CA) according to  
524 the manufacturer's instructions and purified by phenol-chloroform extraction (73). cDNA  
525 libraries were prepared from mRNA-enriched RNA samples using an NEBNext Ultra RNA  
526 library prep kit (New England Biolabs, Ipswich, MA) according to the manufacturer's  
527 instructions. Libraries were sequenced on an Illumina NextSeq 2500 instrument with 250-  
528 basepair single-end reads at the Harvard University Bauer Core. Sequences were matched to the  
529 BB2000 reference genome (accession number CP004022) using Tophat 2 (74). Differential  
530 expression data were generated using the Cufflinks RNA-Seq analysis suite (75) run on the  
531 Harvard Odyssey cluster, courtesy of the Harvard University Research Computing Group. Data  
532 were analyzed using the CummeRbund package for R and Microsoft Excel (75). Bioinformatics  
533 information was derived from KEGG (76). The data in this paper represent the combined  
534 analysis of two independent biological repeats.

535



536 **Acknowledgements**

537 We would like to thank Drs. Enrique Balleza and Philippe Cluzel for the kind gift of the Venus  
538 construct and members of the Gibbs, D'Souza, Gaudet, and Losick labs for thoughtful discussion  
539 and feedback. Drs. Doug Richardson, Sven Terclavers, and Sebastian Gliem assisted with  
540 imaging on the Cell Observer. We would like to thank the staff of the Bauer Core at Harvard  
541 University for assistance with RNA-Seq and Maria Ericsson of the Harvard Medical School  
542 Electron Microscopy facility for assistance with TEM (Supplemental Information). This research  
543 was funded by a Smith Family Fellowship in Science and Engineering, a Simmons Family  
544 Award for the Harvard Center for Biological Imaging, the David and Lucile Packard Foundation,  
545 the Merck Family Fund, and Harvard University.

546

547 **Conflicts of Interest**

548 The authors declare no conflicts of interest.

549

550 **Author Contributions**

551 KL and KAG conceived and coordinated the study and wrote the paper. KL performed all  
552 experiments, except the RNA-Seq which was performed by MJT. All authors edited the paper.

553

554

555 **References**

- 556 1. **Armbruster CE, Forsyth-DeOrnellas V, Johnson AO, Smith SN, Zhao L, Wu W,**  
557 **Mobley HLT.** 2017. Genome-wide transposon mutagenesis of *Proteus mirabilis*:  
558 Essential genes, fitness factors for catheter-associated urinary tract infection, and the  
559 impact of polymicrobial infection on fitness requirements. *PLoS Pathog* **13**:e1006434.
- 560 2. **Burall LS, Harro JM, Li X, Lockatell CV, Himpsl SD, Hebel JR, Johnson DE,**  
561 **Mobley HLT.** 2004. *Proteus mirabilis* Genes that contribute to pathogenesis of urinary  
562 tract infection: Identification of 25 signature-tagged mutants attenuated at least 100-fold.  
563 *Infect Immun* **72**:2922–2938.
- 564 3. **Hoener J.** 1965. Development of flagella by *Proteus mirabilis*. *Microbiology* **40**:29–42.
- 565 4. **Hoener JF.** 1966. Cellular changes accompanying the swarming of *Proteus mirabilis*.  
566 II. Observations of stained organisms. *Can J Microbiol* **12**:113–123.
- 567 5. **Hauser G.** 1885. Ueber Fäulnisbakterien und deren Beziehungen zur Septicämie: Ein  
568 Beitrag zur Morphologie der Spaltpilze.
- 569 6. **Howery KE, Clemmer KM, Şimşek E, Kim M, Rather PN.** 2015. Regulation of the  
570 Min Cell division inhibition complex by the Rcs Phosphorelay in *Proteus mirabilis*. *J*  
571 *Bacteriol* **197**:2499–2507.
- 572 7. **Howery KE, Clemmer KM, Rather PN.** 2016. The Rcs regulon in *Proteus mirabilis*:  
573 implications for motility, biofilm formation, and virulence. *Curr Genet*.
- 574 8. **Prüss BM, Matsumura P.** 1996. A regulator of the flagellar regulon of *Escherichia coli*,  
575 *flhD*, also affects cell division. *J Bacteriol* **178**:668–674.
- 576 9. **Furness RB, Fraser GM, Hay NA, Hughes C.** 1997. Negative feedback from a *Proteus*  
577 class II flagellum export defect to the *flhDC* master operon controlling cell division and

- 578 flagellum assembly. J Bacteriol **179**:5585–5588.
- 579 10. **Jones BV, Young R, Mahenthiralingam E, Stickler DJ.** 2004. Ultrastructure of *Proteus*  
580 *mirabilis* swarmer cell rafts and role of swarming in catheter-associated urinary tract  
581 infection. Infect Immun **72**:3941–3950.
- 582 11. **Rauprich O, Matsushita M, Weijer CJ, Siegert F, Esipov SE, Shapiro JA.** 1996.  
583 Periodic phenomena in *Proteus mirabilis* swarm colony development. J Bacteriol  
584 **178**:6525–6538.
- 585 12. **Pearson MM, Rasko DA, Smith SN, Mobley HLT.** 2010. Transcriptome of swarming  
586 *Proteus mirabilis*. Infect Immun **78**:2834–2845.
- 587 13. **Allison C, Lai HC, Hughes C.** 1992. Co-ordinate expression of virulence genes during  
588 swarm-cell differentiation and population migration of *Proteus mirabilis*. Molecular  
589 Microbiology **6**:1583–1591.
- 590 14. **Clemmer KM, Rather PN.** 2008. The Lon protease regulates swarming motility and  
591 virulence gene expression in *Proteus mirabilis*. Journal of Medical Microbiology **57**:931–  
592 937.
- 593 15. **Fraser GM, Claret L, Furness R, Gupta S, Hughes C.** 2002. Swarming-coupled  
594 expression of the *Proteus mirabilis* *hpmBA* haemolysin operon. Microbiology (Reading,  
595 Engl) **148**:2191–2201.
- 596 16. **Morgenstein RM, Szostek B, Rather PN.** 2010. Regulation of gene expression during  
597 swarmer cell differentiation in *Proteus mirabilis*. FEMS Microbiology Reviews **34**:753–  
598 763.
- 599 17. **Armitage JP, Smith DG, Rowbury RJ.** 1979. Alterations in the cell envelope  
600 composition of *Proteus mirabilis* during the development of swarmer cells. Biochim

- 601 Biophys Acta **584**:389–397.
- 602 18. **Armitage JP**. 1982. Changes in the organization of the outer membrane of *Proteus*  
603 *mirabilis* during swarming: freeze-fracture structure and membrane fluidity analysis. J  
604 Bacteriol **150**:900–904.
- 605 19. **Gué M, Dupont V, Dufour A, Sire O**. 2001. Bacterial swarming: a biochemical time-  
606 resolved FTIR-ATR study of *Proteus mirabilis* swarm-cell differentiation. Biochemistry  
607 **40**:11938–11945.
- 608 20. **Jorgenson MA, Kannan S, Laubacher ME, Young KD**. 2016. Dead-end intermediates  
609 in the Enterobacterial common antigen pathway induce morphological defects in  
610 *Escherichia coli* by competing for undecaprenyl phosphate. Molecular Microbiology  
611 **100**:1–14.
- 612 21. **Jorgenson MA, Young KD**. 2016. Interrupting biosynthesis of O Antigen or the  
613 lipopolysaccharide core produces morphological defects in *Escherichia coli* by  
614 sequestering undecaprenyl phosphate. J Bacteriol **198**:3070–3079.
- 615 22. **Morgenstein RM, Rather PN**. 2012. Role of the Umo proteins and the Rcs phosphorelay  
616 in the swarming motility of the wild type and an O-antigen (*waaL*) mutant of *Proteus*  
617 *mirabilis*. J Bacteriol **194**:669–676.
- 618 23. **Morgenstein RM, Clemmer KM, Rather PN**. 2010. Loss of the *waaL* O-antigen ligase  
619 prevents surface activation of the flagellar gene cascade in *Proteus mirabilis*. J Bacteriol  
620 **192**:3213–3221.
- 621 24. **Liu M-C, Kuo K-T, Chien H-F, Tsai Y-L, Liaw S-J**. 2015. New aspects of RpoE in  
622 uropathogenic *Proteus mirabilis*. Infect Immun **83**:966–977.
- 623 25. **Jiang SS, Lin TY, Wang WB, Liu MC, Hsueh PR, Liaw SJ**. 2010. Characterization of

- 624 UDP-glucose dehydrogenase and UDP-glucose pyrophosphorylase mutants of *Proteus*  
625 *mirabilis*: defectiveness in polymyxin B resistance, swarming, and virulence.  
626 Antimicrobial Agents and Chemotherapy **54**:2000–2009.
- 627 26. **Castelli ME, Vécovi EG.** 2011. The Rcs signal transduction pathway is triggered by  
628 Enterobacterial common antigen structure alterations in *Serratia marcescens*. J Bacteriol  
629 **193**:63–74.
- 630 27. **Francez-Charlot A, Laugel B, Van Gemert A, Dubarry N, Wiorowski F, Castanié-**  
631 **Cornet M-P, Gutierrez C, Cam K.** 2004. RcsCDB His-Asp phosphorelay system  
632 negatively regulates the *flhDC* operon in *Escherichia coli*. Molecular Microbiology  
633 **49**:823–832.
- 634 28. **Toguchi A, Siano M, Burkart M, Harshey RM.** 2000. Genetics of swarming motility in  
635 *Salmonella enterica* serovar typhimurium: critical role for lipopolysaccharide. J Bacteriol  
636 **182**:6308–6321.
- 637 29. **Clemmer KM, Rather PN.** 2007. Regulation of *flhDC* expression in *Proteus mirabilis*.  
638 Research in Microbiology **158**:295–302.
- 639 30. **Wang WB, Chen I-C, Jiang SS, Chen HR, Hsu CY, Hsueh PR, Hsu WB, Liaw SJ.**  
640 2008. Role of RppA in the Regulation of Polymyxin B susceptibility, swarming, and  
641 virulence factor expression in *Proteus mirabilis*. Infect Immun **76**:2051–2062.
- 642 31. **Laubacher ME, Ades SE.** 2008. The Rcs phosphorelay is a cell envelope stress response  
643 activated by peptidoglycan stress and contributes to intrinsic antibiotic resistance. J  
644 Bacteriol **190**:2065–2074.
- 645 32. **Majdalani N, Gottesman S.** 2005. The Rcs phosphorelay: a complex signal transduction  
646 system. Annu Rev Microbiol **59**:379–405.

- 647 33. **Clarke DJ.** 2010. The Rcs phosphorelay: more than just a two-component pathway.  
648 *Future Microbiology* **5**:1173–1184.
- 649 34. **Bode NJ, Debnath I, Kuan L, Schulfer A, Ty M, Pearson MM.** 2015. Transcriptional  
650 analysis of the MrpJ network: modulation of diverse virulence-associated genes and direct  
651 regulation of *mrp* fimbrial and *flhDC* flagellar operons in *Proteus mirabilis*. *Infect Immun*  
652 **83**:2542–2556.
- 653 35. **Meier-Dieter U, Starman R, Barr K, Mayer H, Rick PD.** 1990. Biosynthesis of  
654 Enterobacterial common antigen in *Escherichia coli*. Biochemical characterization of  
655 Tn10 insertion mutants defective in Enterobacterial common antigen synthesis. *J Biol*  
656 *Chem* **265**:13490–13497.
- 657 36. **Claret L, Hughes C.** 2000. Functions of the subunits in the FlhD2C2 transcriptional  
658 master regulator of bacterial flagellum biogenesis and swarming. *Journal of Molecular*  
659 *Biology* **303**:467–478.
- 660 37. **Pearson MM, Yep A, Smith SN, Mobley HLT.** 2011. Transcriptome of *Proteus*  
661 *mirabilis* in the murine urinary tract: virulence and nitrogen assimilation gene expression.  
662 *Infect Immun* **79**:2619–2631.
- 663 38. **Kuhn HM, Neter E, Mayer H.** 1983. Modification of the lipid moiety of the  
664 Enterobacterial common antigen by the "*Pseudomonas* factor". *Infect Immun* **40**:696–700.
- 665 39. **Kiss P, Rinno J, Schmidt G, Mayer H.** 1978. Structural studies on the immunogenic  
666 form of the Enterobacterial common antigen. *Eur J Biochem* **88**:211–218.
- 667 40. **Dell A, Oates J, Lugowski C, Romanowska E, Kenne L, Lindberg B.** 1984. The  
668 Enterobacterial common-antigen, a cyclic polysaccharide. *Carbohydr Res* **133**:95–104.
- 669 41. **Rick PD, Mayer H, Neumeier BA, Wolski S, Bitter-Suermann D.** 1985. Biosynthesis

- 670 of Enterobacterial common antigen. J Bacteriol **162**:494–503.
- 671 42. **Duda KA, Duda KT, Beczala A, Kasperkiewicz K, Radziejewska-Lebrecht J,**  
672 **Skurnik M.** 2009. ECA-immunogenicity of *Proteus mirabilis* strains. Arch Immunol Ther  
673 Exp **57**:147–151.
- 674 43. **Kunin CM.** 1963. Separation, characterization, and biological significance of a common  
675 antigen in Enterobacteriaceae. J Exp Med **118**:565–586.
- 676 44. **Whang HY, Neter E.** 1962. Immunological studies of a heterogenetic Enterobacterial  
677 antigen (Kunin). J Bacteriol **84**:1245–1250.
- 678 45. **Fomsgaard A, Freudenberg MA, Galanos C.** 1990. Modification of the silver staining  
679 technique to detect lipopolysaccharide in polyacrylamide gels. Journal of Clinical  
680 Microbiology **28**:2627–2631.
- 681 46. **McCoy AJ, Liu H, Falla TJ, Gunn JS.** 2001. Identification of *Proteus mirabilis* mutants  
682 with increased sensitivity to antimicrobial peptides. Antimicrobial Agents and  
683 Chemotherapy **45**:2030–2037.
- 684 47. **Merritt ME, Donaldson JR.** 2009. Effect of bile salts on the DNA and membrane  
685 integrity of enteric bacteria. Journal of Medical Microbiology **58**:1533–1541.
- 686 48. **Ramos-Morales F, Prieto AI, Beuzon CR, Holden DW, Casadesus J.** 2003. Role for  
687 *Salmonella enterica* Enterobacterial common antigen in bile resistance and virulence. J  
688 Bacteriol **185**:5328–5332.
- 689 49. **Elßner T, Preußner A, Wagner U, Kleber HP.** 1999. Metabolism of L(-)-carnitine by  
690 *Enterobacteriaceae* under aerobic conditions. FEMS Microbiology Letters **174**:295–301.
- 691 50. **Eichler K, Buchet A, Lemke R, Kleber HP, Mandrand-Berthelot MA.** 1996.  
692 Identification and characterization of the *caiF* gene encoding a potential transcriptional

- 693 activator of carnitine metabolism in *Escherichia coli*. *J Bacteriol* **178**:1248–1257.
- 694 51. **Engemann C, Kleber HP**. 2001. Epigenetic regulation of carnitine metabolising enzymes  
695 in *Proteus* sp. under aerobic conditions. *FEMS Microbiology Letters* **196**:1–6.
- 696 52. **Landfald B, Strøm AR**. 1986. Choline-glycine betaine pathway confers a high level of  
697 osmotic tolerance in *Escherichia coli*. *J Bacteriol* **165**:849–855.
- 698 53. **Beumer RR, Giffel Te MC, Cox LJ, Rombouts FM, Abee T**. 1994. Effect of exogenous  
699 proline, betaine, and carnitine on growth of *Listeria monocytogenes* in a minimal medium.  
700 *Applied and Environmental Microbiology* **60**:1359–1363.
- 701 54. **Meadows JA, Wargo MJ**. 2015. Carnitine in bacterial physiology and metabolism.  
702 *Microbiology* **161**:1161–1174.
- 703 55. **Xiao M, Lai Y, Sun J, Chen G, Yan A**. 2016. Transcriptional regulation of the outer  
704 membrane porin gene *ompW* reveals its physiological role during the transition from the  
705 aerobic to the anaerobic lifestyle of *Escherichia coli*. *Front Microbiol* **7**:799.
- 706 56. **Lane MC, Li X, Pearson MM, Simms AN, Mobley HLT**. 2009. Oxygen-limiting  
707 conditions enrich for fimbriate cells of uropathogenic *Proteus mirabilis* and *Escherichia*  
708 *coli*. *J Bacteriol* **191**:1382–1392.
- 709 57. **Yao Z, Kahne D, Kishony R**. 2012. Distinct single-cell morphological dynamics under  
710 beta-lactam antibiotics. *Molecular Cell* **48**:705–712.
- 711 58. **Ranjit DK, Young KD**. 2013. The Rcs stress response and accessory envelope proteins  
712 are required for *de novo* generation of cell shape in *Escherichia coli*. *J Bacteriol*  
713 **195**:2452–2462.
- 714 59. **Anderson-Furgeson JC, Zupan JR, Grangeon R, Zambryski PC**. 2016. Loss of PodJ  
715 in *Agrobacterium tumefaciens* leads to ectopic polar growth, branching, and reduced cell



- 716 division. *J Bacteriol* **198**:1883–1891.
- 717 60. **de Pedro MA, Young KD, Höltje J-V, Schwarz H.** 2003. Branching of *Escherichia coli*  
718 cells arises from multiple sites of inert peptidoglycan. *J Bacteriol* **185**:1147–1152.
- 719 61. **Nilsen T, Ghosh AS, Goldberg MB, Young KD.** 2004. Branching sites and  
720 morphological abnormalities behave as ectopic poles in shape-defective *Escherichia coli*.  
721 *Molecular Microbiology* **52**:1045–1054.
- 722 62. **Potluri L-P, de Pedro MA, Young KD.** 2012. *Escherichia coli* low-molecular-weight  
723 penicillin-binding proteins help orient septal FtsZ, and their absence leads to asymmetric  
724 cell division and branching. *Molecular Microbiology* **84**:203–224.
- 725 63. **Zupan JR, Cameron TA, Anderson-Furgeson J, Zambryski PC.** 2013. Dynamic FtsA  
726 and FtsZ localization and outer membrane alterations during polar growth and cell  
727 division in *Agrobacterium tumefaciens*. *Proceedings of the National Academy of Sciences*  
728 **110**:9060–9065.
- 729 64. **Pannen D, Fabisch M, Gausling L, Schnetz K.** 2016. Interaction of the RcsB response  
730 regulator with auxiliary transcription regulators in *Escherichia coli*. *Journal of Biological*  
731 *Chemistry* **291**:2357–2370.
- 732 65. **Belas R, Erskine D, Flaherty D.** 1991. Transposon mutagenesis in *Proteus mirabilis*. *J*  
733 *Bacteriol* **173**:6289–6293.
- 734 66. **Gibbs KA, Urbanowski ML, Greenberg EP.** 2008. Genetic determinants of self identity  
735 and social recognition in bacteria. *Science* **321**:256–259.
- 736 67. **Kaniga K, Delor I, Cornelis GR.** 1991. A wide-host-range suicide vector for improving  
737 reverse genetics in gram-negative bacteria: inactivation of the *blaA* gene of *Yersinia*  
738 *enterocolitica*. *Gene* **109**:137–141.

- 739 68. **Saak CC, Gibbs KA.** 2016. The self-identity protein IdsD is communicated between cells  
740 in swarming *Proteus mirabilis* Colonies. *J Bacteriol* **198**:3278–3286.
- 741 69. **Zhang Y, Werling U, Edelmann W.** 2012. SLiCE: a novel bacterial cell extract-based  
742 DNA cloning method. *Nucleic Acids Research* **40**:e55–e55.
- 743 70. **Guzman LM, Belin D, Carson MJ, Beckwith J.** 1995. Tight regulation, modulation, and  
744 high-level expression by vectors containing the arabinose PBAD promoter. *J Bacteriol*  
745 **177**:4121–4130.
- 746 71. **Balleza E, Kim JM, Cluzel P.** 2018. Systematic characterization of maturation time of  
747 fluorescent proteins in living cells. *Nat Methods* **15**:47–51.
- 748 72. **Schindelin J, Arganda-Carreras I, Frise E, Kaynig V, Longair M, Pietzsch T,**  
749 **Preibisch S, Rueden C, Saalfeld S, Schmid B, Tinevez J-Y, White DJ, Hartenstein V,**  
750 **Eliceiri K, Tomancak P, Cardona A.** 2012. Fiji: an open-source platform for biological-  
751 image analysis. *Nat Methods* **9**:676–682.
- 752 73. **Sambrook J, Russell DW.** 2006. Purification of nucleic acids by extraction with phenol:  
753 chloroform. *Cold Spring Harbor Protocols* **2006**:pdb.prot4455.
- 754 74. **Kim D, Pertea G, Trapnell C, Pimentel H, Kelley R, Salzberg SL.** 2013. TopHat2:  
755 accurate alignment of transcriptomes in the presence of insertions, deletions and gene  
756 fusions. *Genome Biol* **14**:R36.
- 757 75. **Trapnell C, Hendrickson DG, Sauvageau M, Goff L, Rinn JL, Pachter L.** 2012.  
758 Differential analysis of gene regulation at transcript resolution with RNA-seq. *Nature*  
759 *Biotechnology* **31**:46–53.
- 760 76. **Kanehisa M, Sato Y, Kawashima M, Furumichi M, Tanabe M.** 2016. KEGG as a  
761 reference resource for gene and protein annotation. *Nucleic Acids Research* **44**:D457–62.



763 **Table 1: Antibiotic sensitivity of the wild-type and the  $\Delta rffG$  strains on surfaces**

|                          | Polymyxin B<br>MIC, mg/mL | Bile salt<br>MIC, % w/v | SDS<br>MIC, % w/v | Gentamycin,<br>MIC, $\mu$ g/mL | Kanamycin<br>MIC, $\mu$ g/mL |
|--------------------------|---------------------------|-------------------------|-------------------|--------------------------------|------------------------------|
| the wild-type strain     | > 50                      | 0.2                     | 0.05              | 0.1                            | 0.1                          |
| the $\Delta rffG$ strain | > 50                      | 0.1                     | 0.01              | 0.1                            | 0.1                          |

764

765

766 **Table 2: Top 20 genes down-regulated in the  $\Delta rffG$  strain relative to the wild-type strain.**

| Transcript                                 | Product                                   | Fold Change | Rcs Regulon* |
|--------------------------------------------|-------------------------------------------|-------------|--------------|
| <i>cspB</i>                                | cold shock protein                        | 0.01        |              |
| <i>flgN</i>                                | flagella synthesis protein                | 0.03        |              |
| <i>BB2000_1016</i> ,<br><i>BB2000_1017</i> | cold shock protein, heat shock protein    | 0.04        |              |
| <i>flgM</i>                                | anti-sigma28 factor FlgM                  | 0.04        |              |
| <i>BB2000_3499</i>                         | lipoprotein                               | 0.05        | Yes          |
| <i>fliE</i>                                | flagellar hook-basal body complex protein | 0.05        |              |
| <i>BB2000_1271</i>                         | putative MFS-type transporter YdeE        | 0.07        |              |

|                          |                                                                                    |      |     |
|--------------------------|------------------------------------------------------------------------------------|------|-----|
| <i>fliA</i>              | flagellar biosynthesis sigma factor                                                | 0.08 | Yes |
| <i>BB2000_1466</i>       | hypothetical protein                                                               |      | Yes |
| <i>holD</i>              | DNA polymerase III subunit psi                                                     | 0.10 | Yes |
| <i>intB</i>              | prophage integrase                                                                 | 0.11 |     |
| <i>fliM, fliN</i>        | flagellar motor switch protein FliM,<br>flagellar motor switch protein FliN        | 0.11 | Yes |
| <i>BB2000_0342</i>       | transcriptional regulator                                                          | 0.11 | Yes |
| <i>BB2000_0996, umoD</i> | hypothetical protein, exported protein<br>(upregulator of flagellar master operon) | 0.12 | Yes |
| <i>rpsO</i>              | 30S ribosomal protein S15                                                          | 0.12 |     |
| <i>ccm</i>               | membrane protein (Ccm1 protein)                                                    | 0.12 | Yes |
| <i>rplI</i>              | 50S ribosomal protein L9                                                           | 0.12 |     |
| <i>fliZ</i>              | flagella biosynthesis protein FliZ                                                 | 0.12 | Yes |
| <i>BB2000_2557</i>       | phospholipid-binding protein                                                       | 0.13 | Yes |
| <i>BB2000_2289, fruK</i> | hypothetical protein, 1-<br>phosphofructokinase                                    | 0.13 |     |

767

768

769 \* Based on the published RcsB regulon in *P. mirabilis* (6, 7)

770 **Table 3: Top 20 genes up-regulated in the  $\Delta rffG$  strain relative to the wild-type strain.**

| <b>Transcript</b>  | <b>Product</b>                                        | <b>Fold Change</b> | <b>Rcs Regulon*</b> |
|--------------------|-------------------------------------------------------|--------------------|---------------------|
| <i>mrpA</i>        | major mannose-resistant/Proteus-like fimbrial protein | 200.27             | Yes                 |
| <i>caiF</i>        | DNA-binding transcriptional activator<br>CaiF         | 63.60              |                     |
| <i>pmpA</i>        | fimbrial subunit                                      | 55.46              |                     |
| <i>BB2000_1924</i> | transcriptional regulator                             | 45.63              |                     |
| <i>BB2000_1499</i> | fimbrial subunit                                      | 44.85              |                     |
| <i>BB2000_3017</i> | fimbrial operon regulator                             | 44.59              |                     |
| <i>zntB</i>        | zinc transporter                                      | 42.83              |                     |
| <i>mrpG</i>        | fimbrial subunit                                      | 42.72              |                     |
| <i>BB2000_0667</i> | hypothetical protein                                  |                    |                     |
| <i>ompW</i>        | outer membrane protein W                              | 33.70              |                     |
| <i>BB2000_2725</i> | TetR-family transcriptional regulator                 | 32.64              |                     |
| <i>dcuB</i>        | anaerobic C4-dicarboxylate transporter                | 29.58              |                     |
| <i>BB2000_0531</i> | sigma 54 modulation protein                           | 25.53              |                     |

|                    |                                      |       |     |
|--------------------|--------------------------------------|-------|-----|
| <i>BB2000_0331</i> | heat shock protein HtpX              | 22.81 |     |
| <i>BB2000_0299</i> | hypothetical protein                 | 22.47 |     |
| <i>BB2000_0395</i> | hypothetical protein                 | 21.42 | Yes |
| <i>BB2000_0229</i> | hypothetical protein                 | 21.19 |     |
| <i>BB2000_1497</i> | fimbrial chaperone protein           | 20.97 |     |
| <i>mrpJ</i>        | fimbrial operon regulator            | 19.08 |     |
| <i>dmsA</i>        | dimethyl sulfoxide reductase chain A | 18.99 | Yes |

771

772

773 \* Based on the published RcsB regulon in *P. mirabilis* (6, 7)

774 **Table 4. Strains and plasmids used in this study.**

| <b>Name</b>                               | <b>Description</b>                                                                                                                                 | <b>Source</b>                            |
|-------------------------------------------|----------------------------------------------------------------------------------------------------------------------------------------------------|------------------------------------------|
| BB2000                                    | <i>P. mirabilis</i> strain BB2000                                                                                                                  | (65)                                     |
| KEL01                                     | BB2000 <i>rffG</i> ::Cm <sup>R</sup>                                                                                                               | This study                               |
| KEL01 <i>prffG</i>                        | The $\Delta rffG$ strain carrying plasmid <i>prffG</i> , which encodes constitutive <i>rffG</i> expression.                                        | This study                               |
| BB2000 <i>pflhDC</i>                      | BB2000 carrying plasmid <i>pflhDC</i> , which encodes constitutive <i>flhDC</i> expression.                                                        | This study                               |
| KEL01 <i>pflhDC</i>                       | The $\Delta rffG$ strain carrying plasmid <i>pflhDC</i> , which encodes constitutive <i>flhDC</i> expression.                                      | This study                               |
| KEL02                                     | BB2000 $\Delta rcsB$                                                                                                                               | This study                               |
| KEL03                                     | BB2000 <i>rffG</i> ::Cm <sup>R</sup> $\Delta rcsB$                                                                                                 | This study                               |
| BB2000 <i>fliA-venus</i>                  | BB2000 with a ribosomal binding site (RBS) and the encoding sequence for Venus inserted immediately downstream of the <i>fliA</i> stop codon       | This study;<br>Venus construct from (71) |
| BB2000 <i>fliA-venus</i><br><i>pflhDC</i> | BB2000 carrying plasmid <i>pflhDC</i> with a RBS and the encoding sequence for Venus inserted immediately downstream of the <i>fliA</i> stop codon | This study                               |



|                                          |                                                                                                                                                                      |                                          |
|------------------------------------------|----------------------------------------------------------------------------------------------------------------------------------------------------------------------|------------------------------------------|
| KEL01 <i>fliA-venus</i>                  | The $\Delta rffG$ strain with a RBS and the encoding sequence for Venus inserted immediately downstream of the <i>fliA</i> stop codon                                | This study;<br>Venus construct from (71) |
| KEL01 <i>fliA-venus</i><br><i>pflhDC</i> | The $\Delta rffG$ strain carrying plasmid <i>pflhDC</i> with a RBS and the encoding sequence for Venus inserted immediately downstream of the <i>fliA</i> stop codon | This study                               |
| KEL02 <i>fliA-venus</i>                  | The $\Delta rcsB$ strain with a RBS and the encoding sequence for Venus inserted immediately downstream of the <i>fliA</i> stop codon                                | This study;<br>Venus construct from (71) |
| KEL03 <i>fliA-venus</i>                  | The $\Delta rffG\Delta rcsB$ strain with a RBS and the encoding sequence for Venus inserted immediately downstream of the <i>fliA</i> stop codon                     | This study;<br>Venus construct from (71) |
| <b>Plasmids</b>                          |                                                                                                                                                                      |                                          |
| pBBR1-NheI                               | An empty vector                                                                                                                                                      | (66)                                     |
| <i>prffG</i>                             | The pBBR1-NheI backbone containing the <i>rffG</i> gene under the <i>lac</i> promoter, resulting in constitutive expression in <i>P. mirabilis</i> .                 | This study                               |
| <i>pflhDC</i>                            | The pBBR1-NheI backbone containing the <i>flhDC</i> genes under the <i>lac</i> promoter, resulting in                                                                | This study                               |

|  |                                                  |  |
|--|--------------------------------------------------|--|
|  | constitutive expression in <i>P. mirabilis</i> . |  |
|--|--------------------------------------------------|--|

775

776

777 **Figures**

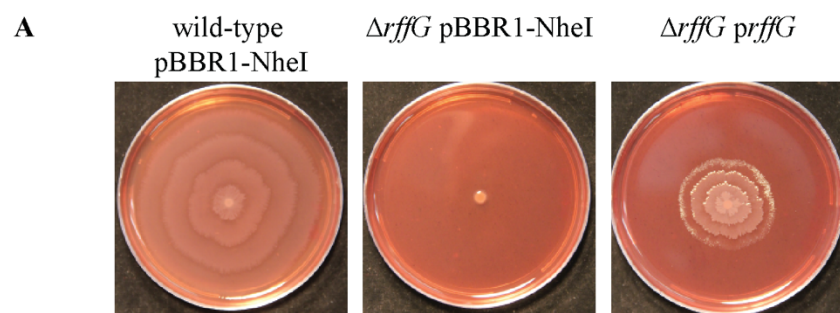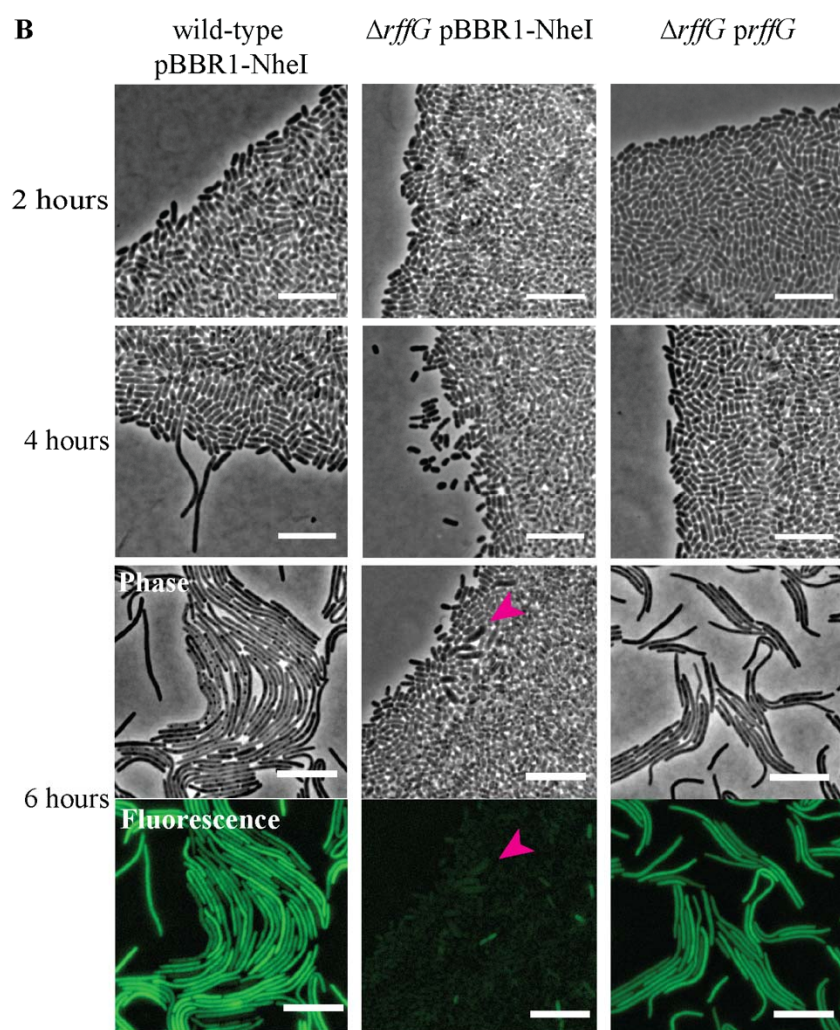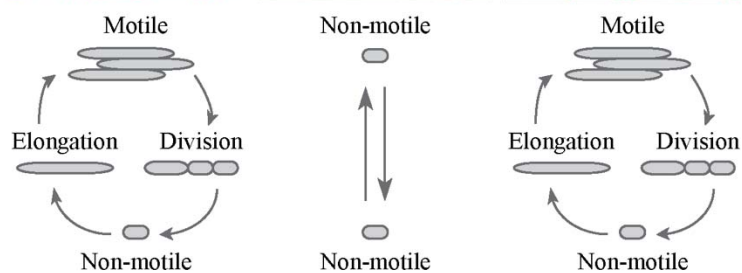

779

780 **Figure 1. Loss of the *rffG* gene inhibits swarmer cell elongation and swarm motility.**

781 A. The wild-type pBBR1-NheI, the  $\Delta rffG$  pBBR1-NheI, and the  $\Delta rffG$  *prffG* strains were grown  
782 on swarm-permissive medium containing kanamycin.

783 B. Phase contrast and epifluorescence microscopy of the BB2000 pBBR1-NheI, the  $\Delta rffG$   
784 pBBR1-NheI, and the  $\Delta rffG$  *prffG* strains after two, four, and six hours on swarm-permissive  
785 medium containing kanamycin. All strains encode Venus immediately downstream of *fliA*.

786 Fluorescence corresponding to *fliA* reporter expression is shown for the six-hour time point.

787 Rolling ball background subtraction was performed using FIJI (72). Magenta arrow highlights an  
788 elongating cell in the  $\Delta rffG$  strain that is bulging. Frames from a time-lapse of such cells bulging

789 are in Supplemental Figure SF1E. At bottom are cartoon depictions of the morphological state of

790 cells grown on swarm permissive solid medium. On surfaces, cells elongate up to 40-fold before

791 engaging in motility and dividing into short (1 – 2  $\mu$ m) non-motile cells. These morphological

792 and behavioral changes coordinate with broad changes to the transcriptome. Scale bars = 10  $\mu$ m.

793

794

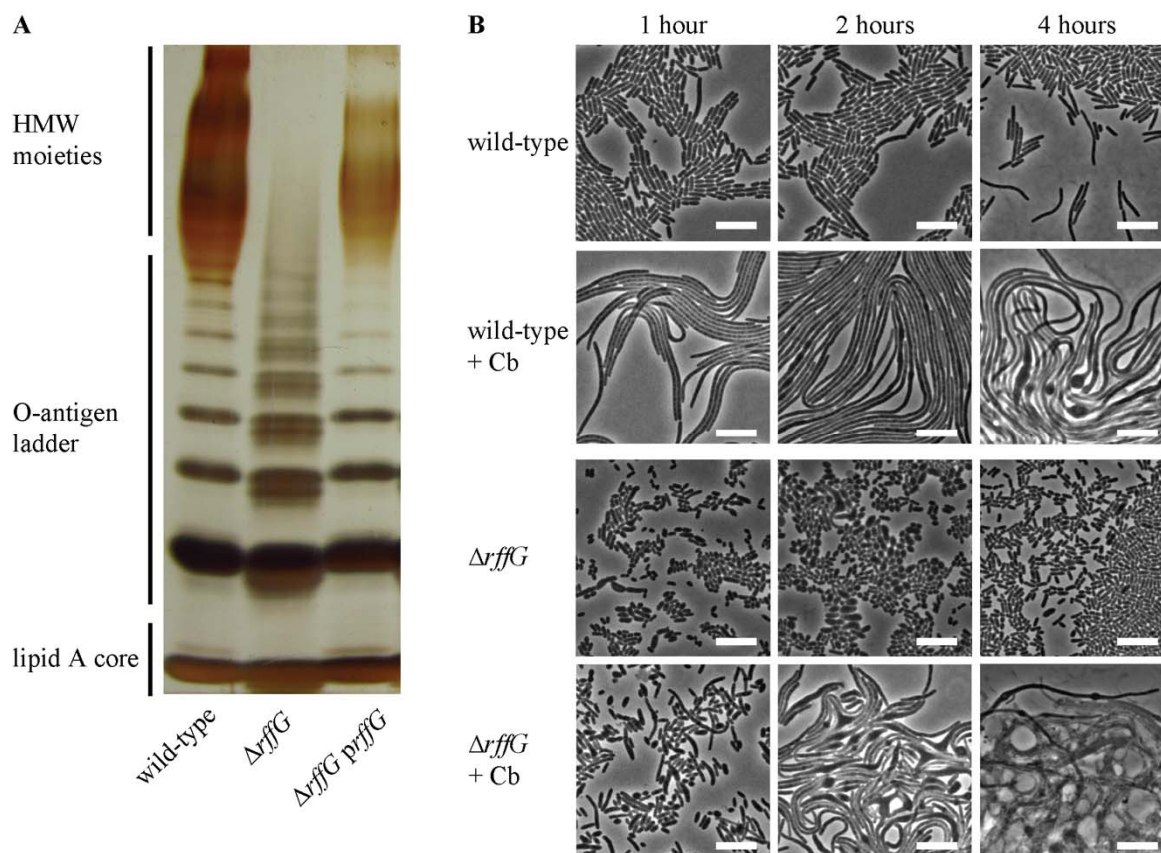

795

796

797 **Figure 2. Loss of the *rffG* gene affects outer membrane structures and cell envelope**

798 **integrity**

799 A. LPS was extracted from surface-grown cells of the wild-type, the  $\Delta rffG$ , and the  $\Delta rffG$  *prffG*

800 strains. Samples were run on a 12% SDS-PAGE gel and detected via silver stain. Predicted LPS-

801 associated moieties are labeled on the left. HMW = high molecular weight.

802 B. The wild-type and the  $\Delta rffG$  strains were spread onto swarm-permissive agar pads containing

803 0 or 10  $\mu\text{g}/\text{mL}$  carbenicillin (Cb). Shown are cells after one, two, or four hours of incubation on a

804 surface. Images are representative;  $N = 3$ . Scale bars = 10  $\mu\text{m}$ .

805

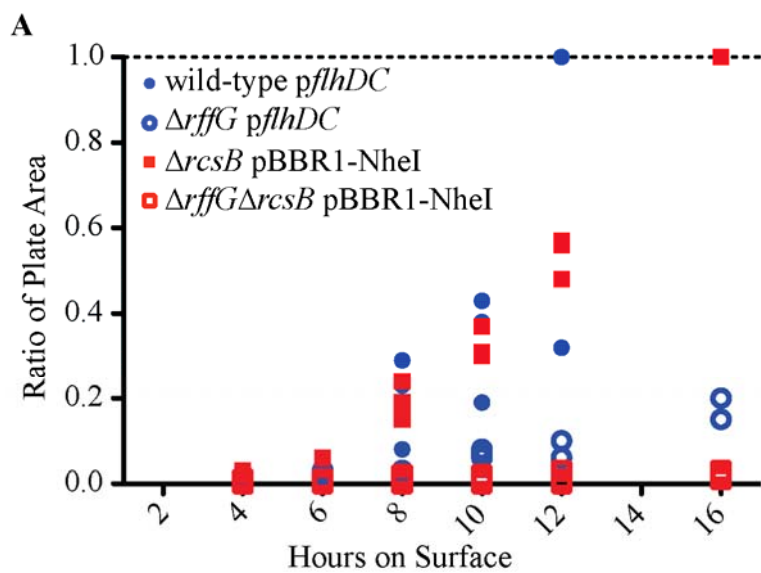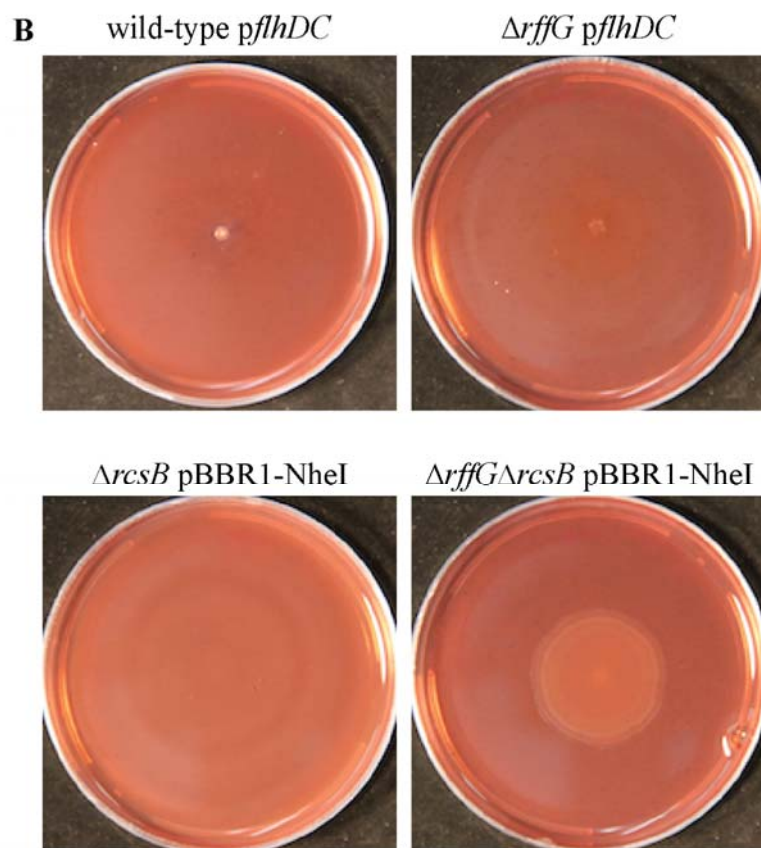

806

807

808

809

810 **Figure 3. Loss of the *rffG* gene impacts swarm colony development.**

811 A. Loss of the *rffG* gene extends the lag phase before swarm colony expansion. Liquid-grown  
812 populations of the wild-type *pflhDC*, the  $\Delta rffG$  *pflhDC*, the  $\Delta rcsB$  pBBR1-NheI, and the  
813  $\Delta rffG\Delta rcsB$  pBBR1-NheI strains were normalized based on OD<sub>600</sub> and inoculated onto swarm  
814 permissive plates containing kanamycin for plasmid retention. Area of visible swarm colony  
815 expansion was measured at indicated times; each time-point comprised of separate plates. N = 3  
816 for each strain and time-point.

817 B. Populations of the wild-type *pflhDC*, the  $\Delta rffG$  *pflhDC*, the  $\Delta rcsB$  pBBR1-NheI, and the  
818  $\Delta rffG\Delta rcsB$  pBBR1-NheI strains were grown on a swarm-permissive plates containing  
819 kanamycin for plasmid retention. Populations of the wild-type *pflhDC* (N = 3), the  $\Delta rffG$  *pflhDC*  
820 (N = 8), and the  $\Delta rcsB$  pBBR1-NheI (N = 4) strains form a thin film with no apparent concentric  
821 rings. Populations of the  $\Delta rffG\Delta rcsB$  pBBR1-NheI strain (N = 4) produced mucoid swarm  
822 colonies that formed tight concentric rings. Representative images are shown.

823

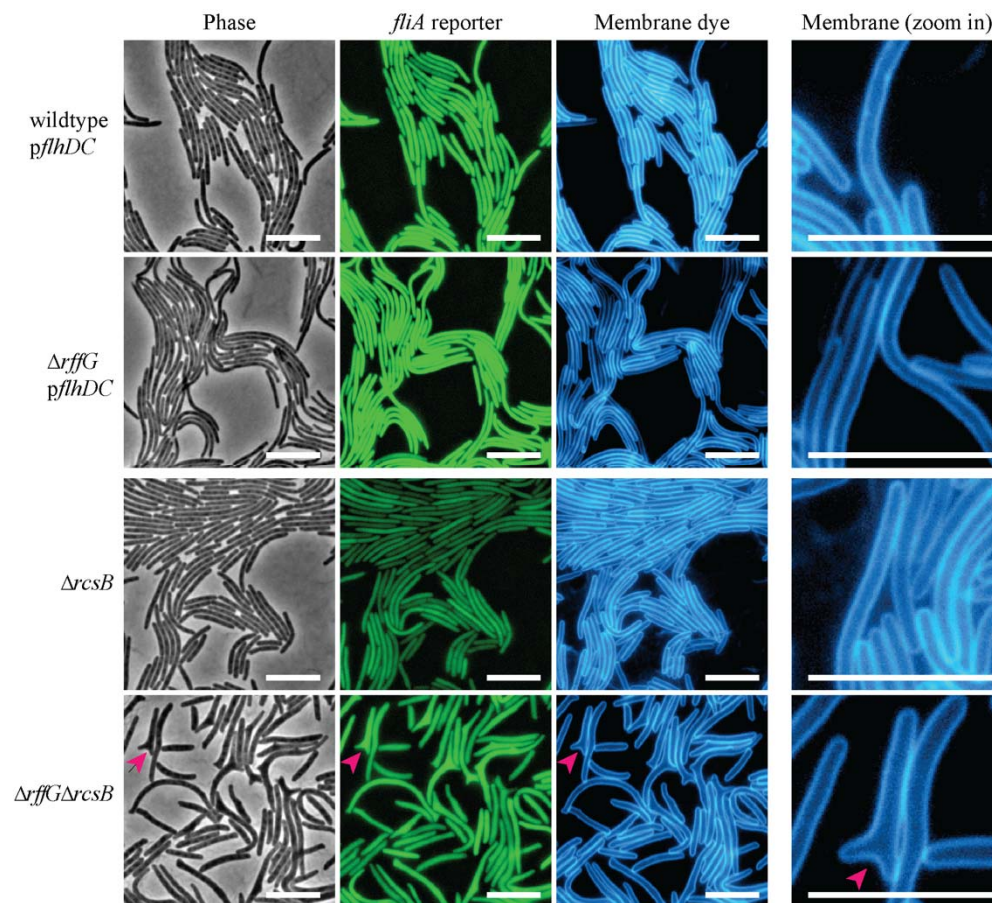

824

825

826 **Figure 4. Swarm cell elongation of  $\Delta rffG$  cells are rescued by increased  $fliA$  expression or**  
827 **deletion of the  $rcsB$  gene**

828 Epifluorescence microscopy of the wild-type  $pflhDC$ , the  $\Delta rffG pflhDC$ , the  $\Delta rcsB$ , and the  
829  $\Delta rffG \Delta rcsB$  strains on swarm permissive agar pads. All strains encode Venus controlled by the  
830 promoter for  $fliA$ . For populations of the wild-type  $pflhDC$  and the  $\Delta rffG pflhDC$  strains, the agar  
831 contained kanamycin for plasmid retention. Images were taken once swarm motility initiated  
832 (four to six hours on surface). Rolling ball background subtraction on  $fliA$  reporter images was  
833 conducted using FIJI (63). Magenta arrows indicate a cell exhibiting shape and polarity defects.  
834 Cropped images are shown on the far right for emphasis on cell shape defects. Left, phase



835 contrast; middle left, Venus expression; middle right, membrane stain; far right, cropped

836 selection of membrane stain image at higher zoom. Scale bars = 10  $\mu\text{m}$ .

837

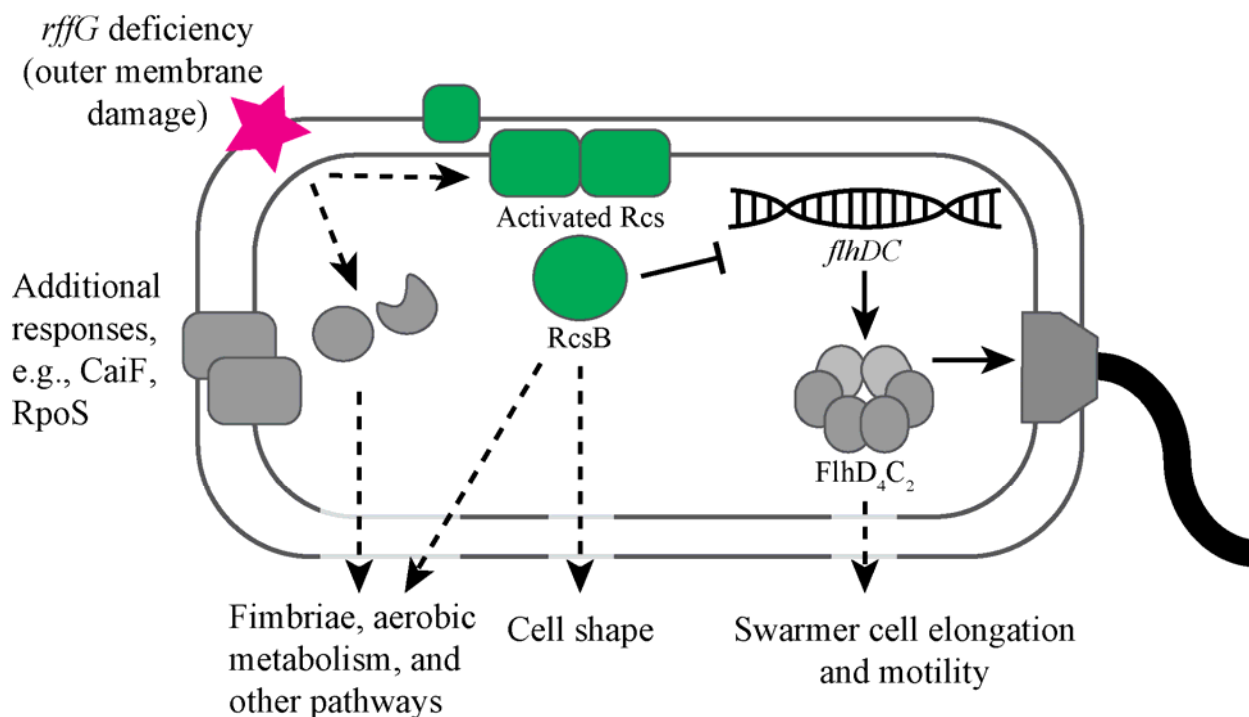

838

839

840 **Figure 5: Checkpoint model in which a *rffG* deficiency induces multiple stress-associated**  
841 **pathways controlling swarmer cell elongation and cell shape**

842 Loss of the *rffG* gene induced activity of RcsB which in turn directly represses expression of the  
843 *flhDC* genes that encode the master regulator of flagella production and swarm motility. We  
844 found that RcsB in *P. mirabilis* was also necessary to maintain cell shape and polarity through  
845 yet uncharacterized mechanisms, supporting a role for RcsB as a multi-functional regulator of  
846 swarmer cell development and motility. The composition of the cell envelope, including the  
847 *rffG*-dependent moieties, may serve as a developmental checkpoint before engaging in swarmer  
848 cell development. Cell elongation and increased *flhDC* expression are initial steps in swarmer  
849 cell development.

850

851
